# Supplementary material for: Influence of weakly coordinating anions binding to the hexa-tert-butyl dysprosocenium cation
Source: Royal Society of Chemistry journal article supplement (doi:10.1039/d4dt02713b), 2024-11-05
Supplement: d4dt02713b1.pdf [file d4dt02713b1.pdf]

**Influence of weakly coordinating anions binding to the hexa-*tert*-butyl dysprosocenium  
cation**

*Sophie C. Corner,<sup>a</sup> Gemma K. Gransbury,<sup>a\*</sup> and David P. Mills<sup>a\*</sup>*

<sup>a</sup>Department of Chemistry, The University of Manchester, Oxford Road, Manchester,  
M13 9PL, U.K.

Email: david.mills@manchester.ac.uk, gemmagransbury@gmail.com.

**Contents**

|                                        |     |
|----------------------------------------|-----|
| <b>1. Infrared Spectroscopy</b> .....  | S2  |
| <b>2. NMR Spectroscopy</b> .....       | S3  |
| <b>3. X-ray Crystallography</b> .....  | S7  |
| <b>4. Magnetic Measurements</b> .....  | S10 |
| <b>5. CASSCF-SO Calculations</b> ..... | S23 |

## 1. Infrared Spectroscopy

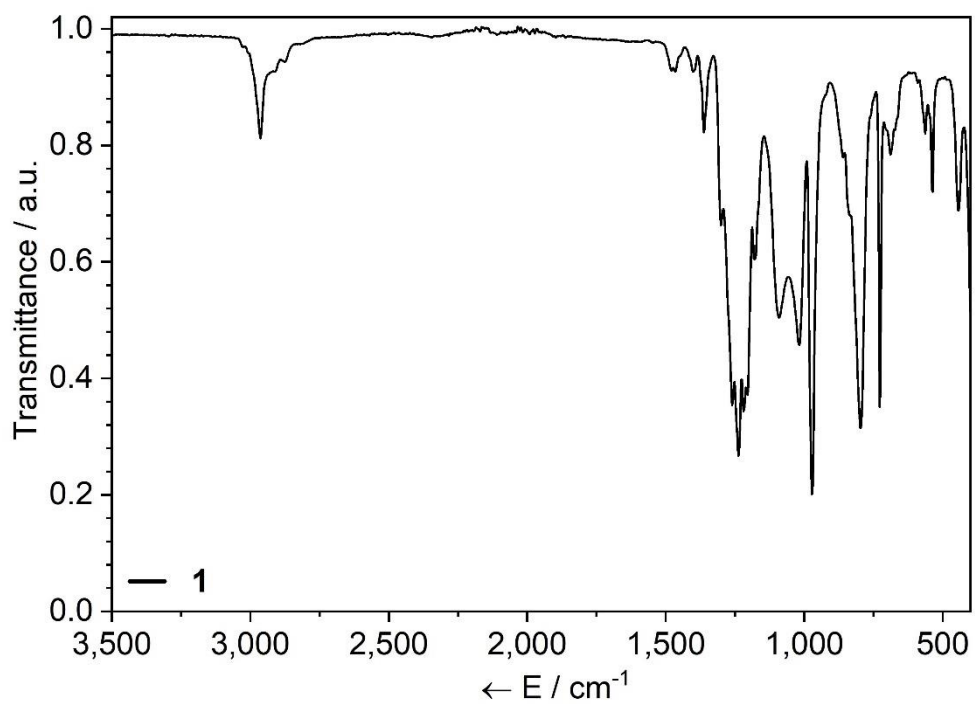

**Figure S1.** ATR-IR spectrum of **1**, recorded as a microcrystalline powder.

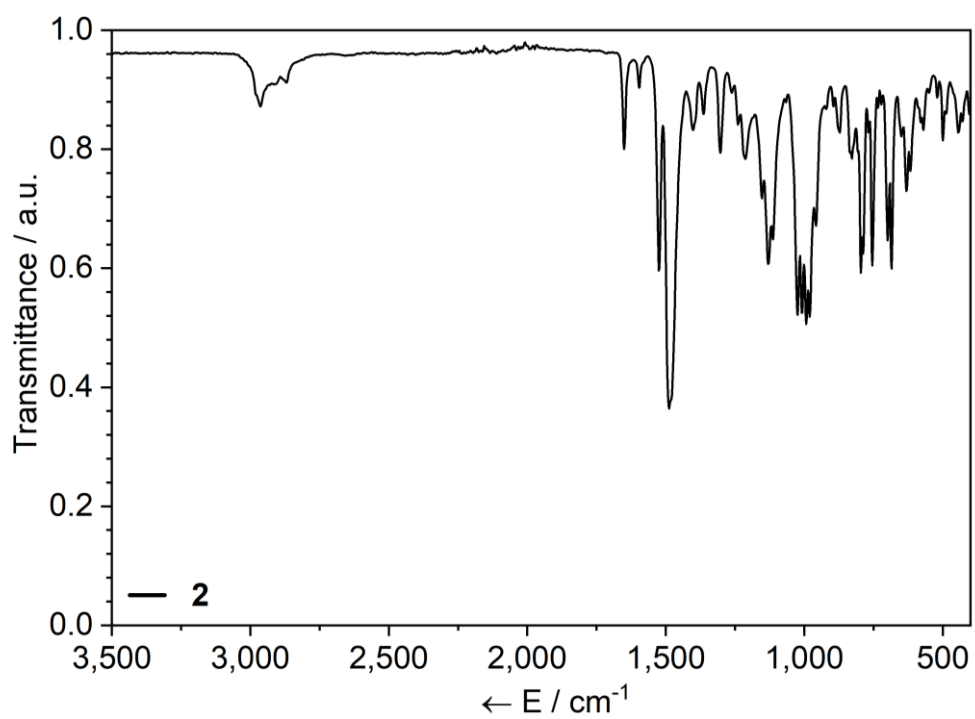

**Figure S2.** ATR-IR spectrum of **2**, recorded as a microcrystalline powder.

## 2. NMR Spectroscopy

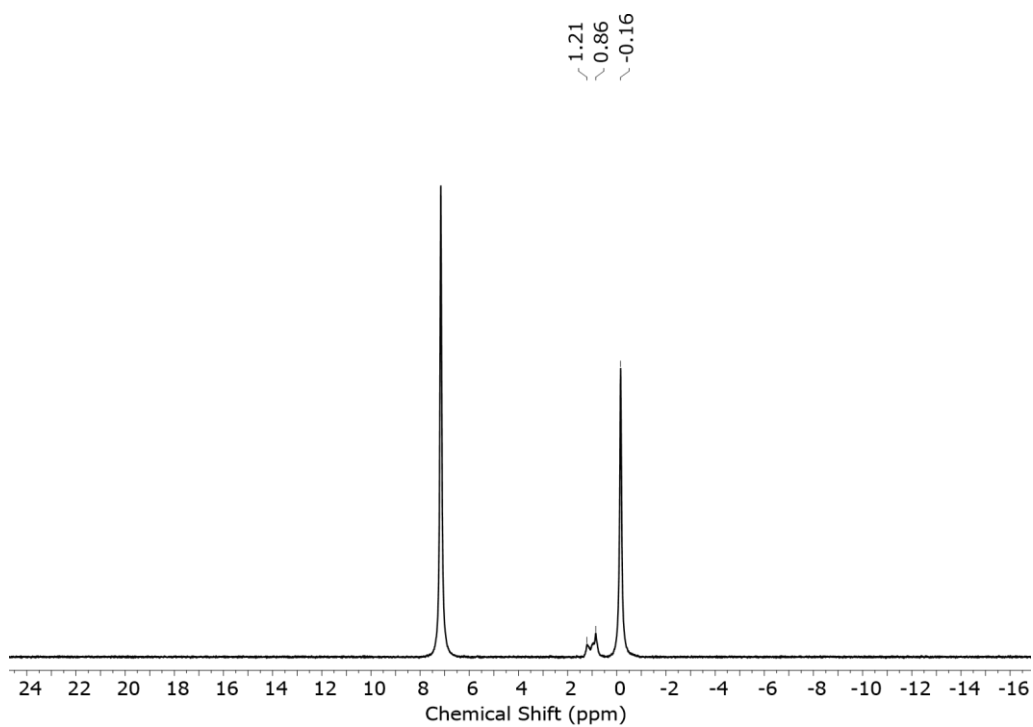

**Figure S3.**  $^1\text{H}$  NMR spectrum of **1** (400 MHz) in  $\text{C}_6\text{H}_5\text{F}$ ; full spectral range 200 to  $-200$  ppm.

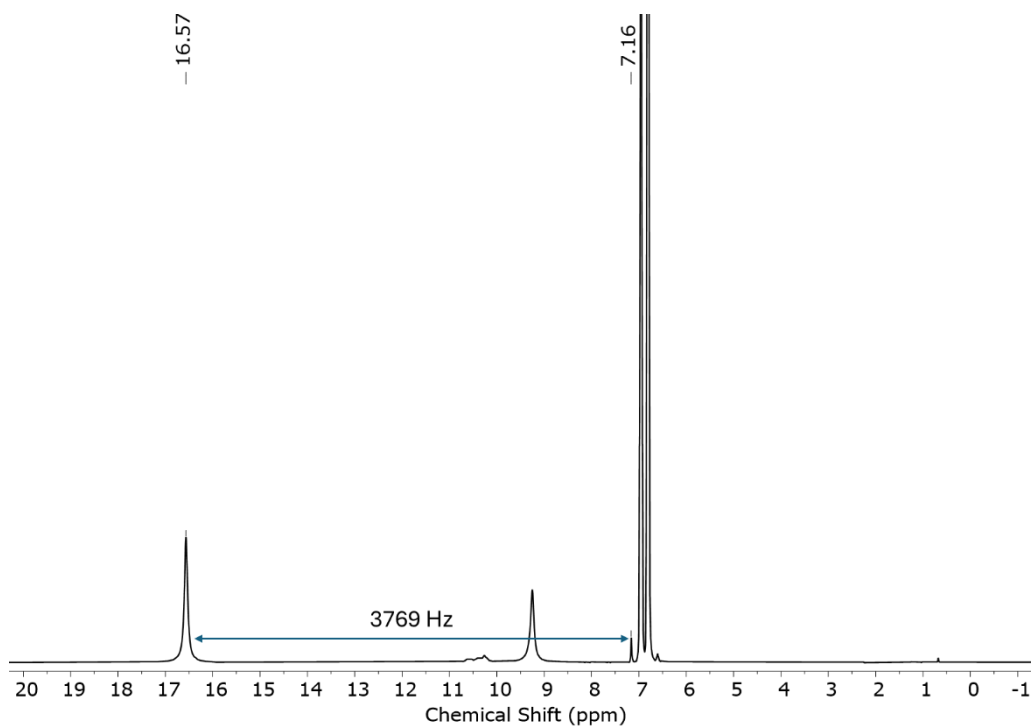

**Figure S4.**  $^1\text{H}$  NMR spectrum of **1** (400 MHz) in  $\text{C}_6\text{H}_5\text{F}$  with a  $\text{C}_6\text{D}_6/\text{C}_6\text{H}_5\text{F}$  insert; full spectral range 200 to  $-200$  ppm.

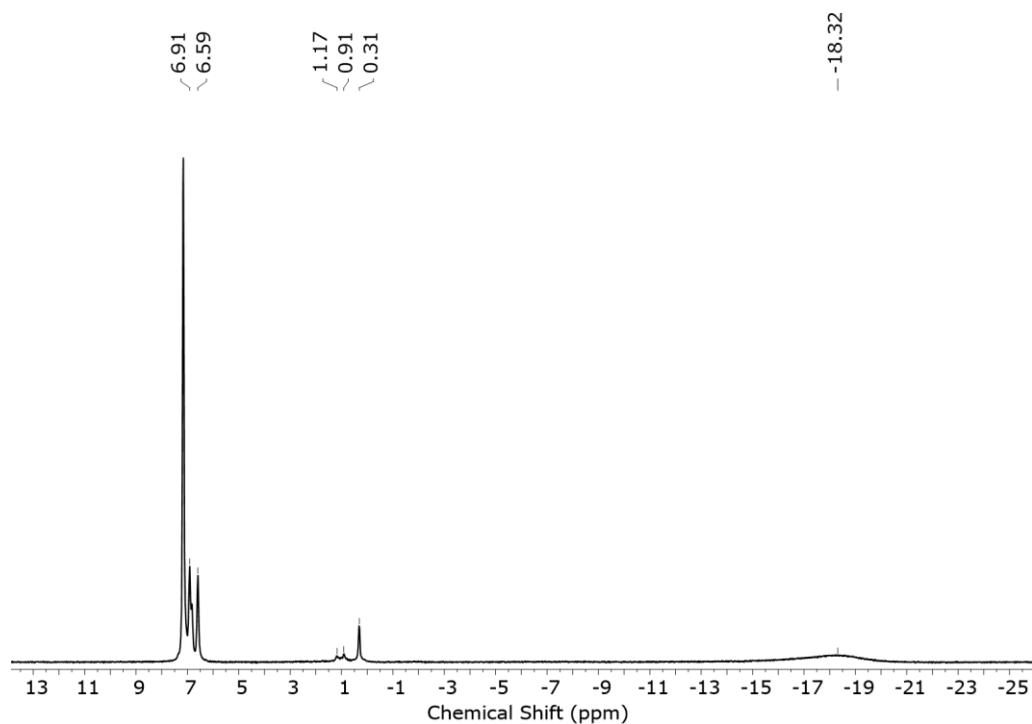

**Figure S5.**  $^1\text{H}$  NMR spectrum of **2** (400 MHz) in  $\text{C}_6\text{H}_5\text{F}$ ; full spectral range 200 to  $-200$  ppm.

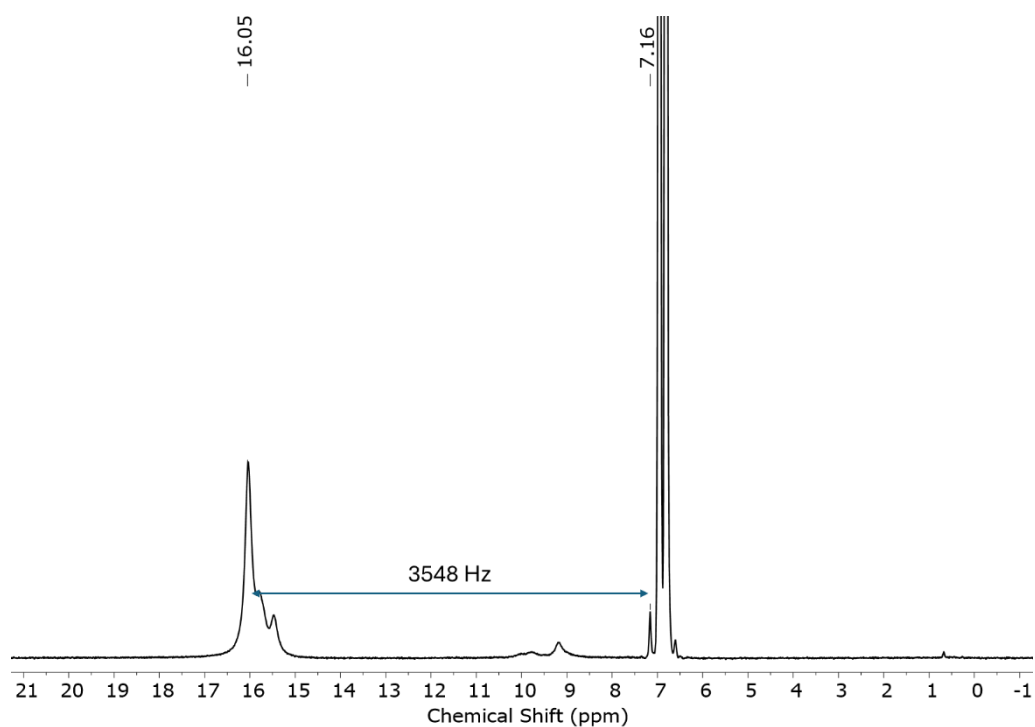

**Figure S6.**  $^1\text{H}$  NMR spectrum of **2** (400 MHz) in  $\text{C}_6\text{H}_5\text{F}$  with a  $\text{C}_6\text{D}_6/\text{C}_6\text{H}_5\text{F}$  insert; full spectral range 200 to  $-200$  ppm.

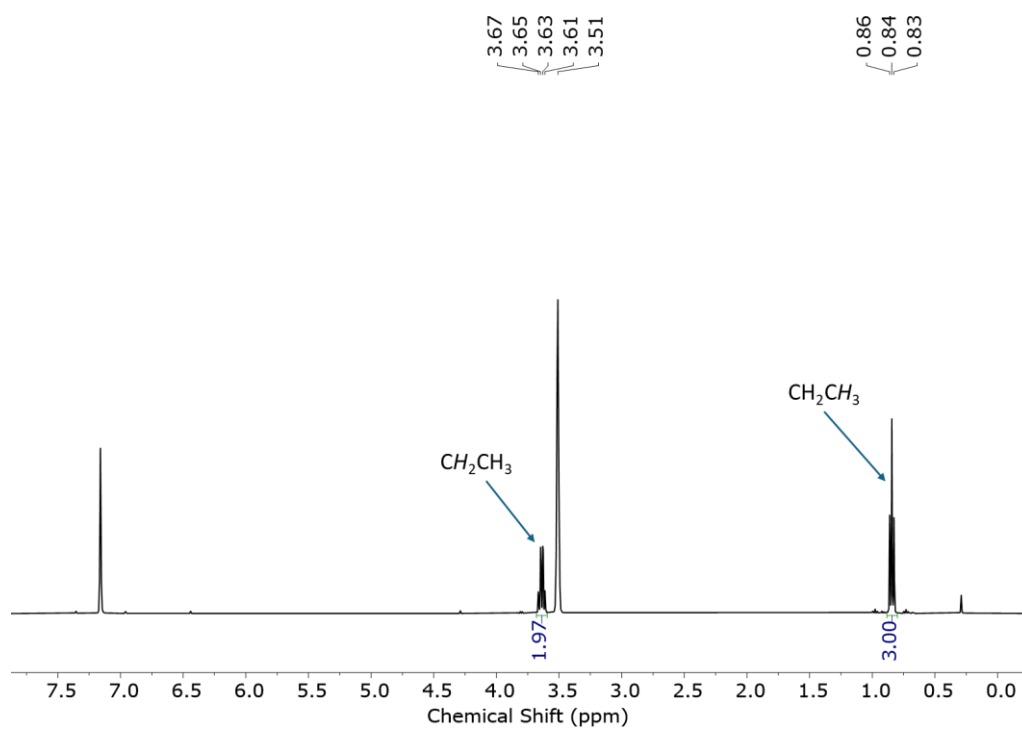

**Figure S7.** <sup>1</sup>H NMR spectrum of [Al(C<sub>2</sub>H<sub>5</sub>){OC(C<sub>6</sub>F<sub>5</sub>)<sub>3</sub>}<sub>2</sub>] (400 MHz) in C<sub>6</sub>D<sub>6</sub>.

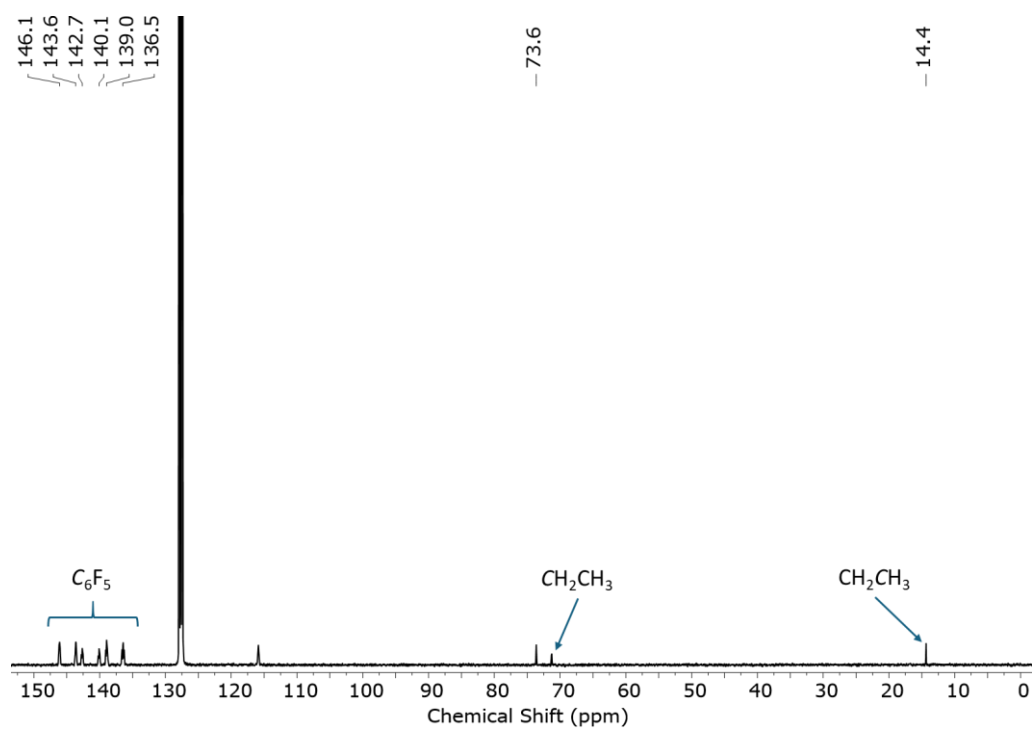

**Figure S8.** <sup>13</sup>C{<sup>1</sup>H} NMR spectrum of [Al(C<sub>2</sub>H<sub>5</sub>){OC(C<sub>6</sub>F<sub>5</sub>)<sub>3</sub>}<sub>2</sub>] (126 MHz) in C<sub>6</sub>D<sub>6</sub>.

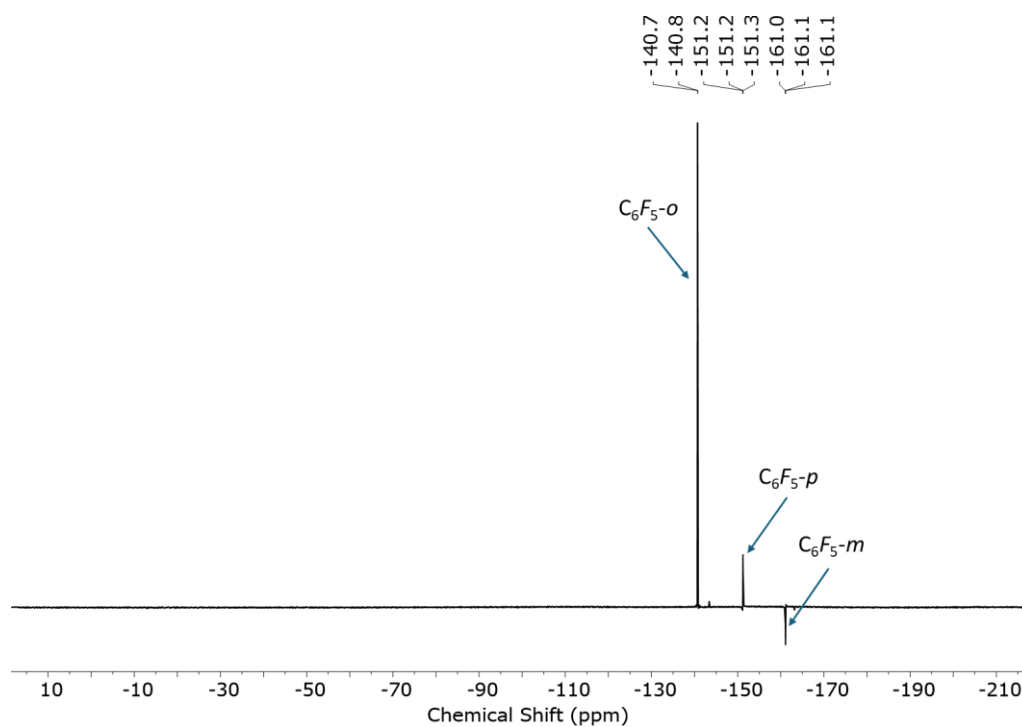

**Figure S9.**  $^{19}F$  NMR spectrum of  $[Al(C_2H_5)\{OC(C_6F_5)_3\}_2]$  (376 MHz) in  $C_6D_6$ .

### 3. X-ray Crystallography

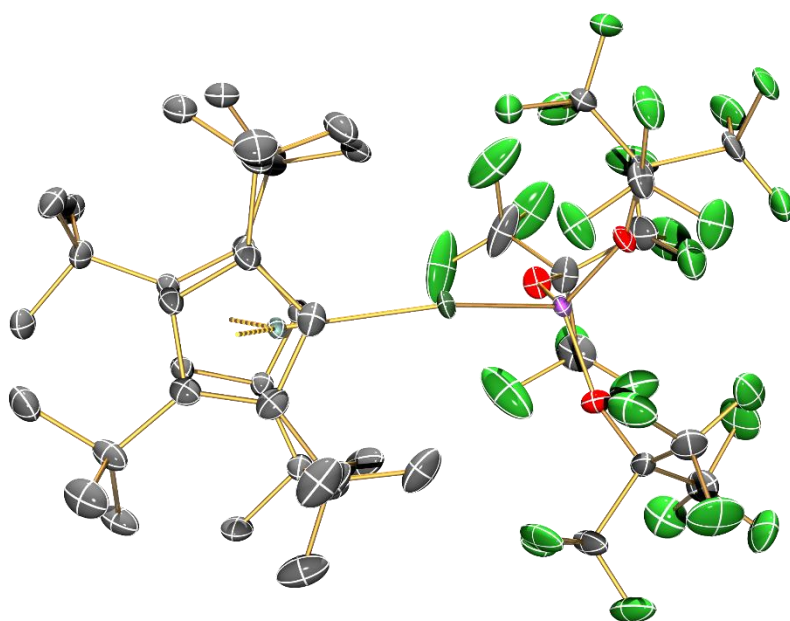

**Figure S10.** Top view of the single crystal XRD structure of **1** (Dy: cyan, C: grey, Al: purple, F: green, O: red). Displacement ellipsoids set at 30% probability levels; hydrogen atoms have been omitted for clarity.

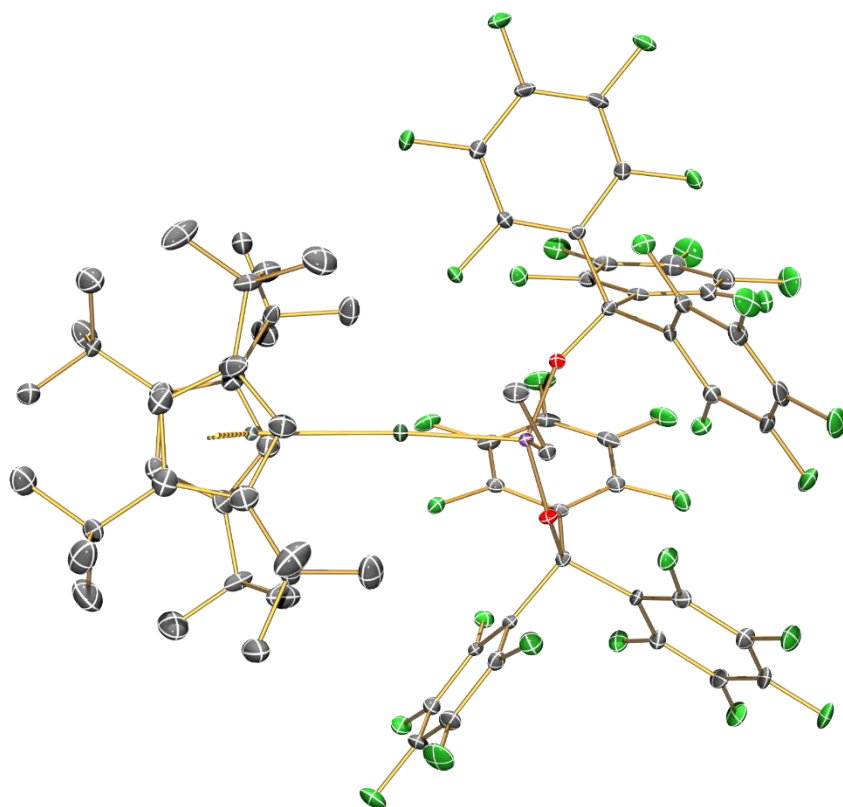

**Figure S11.** Top view of the single crystal XRD structure of **2** (Dy: cyan, C: grey, Al: purple, F: green, O: red). Displacement ellipsoids set at 30% probability levels; hydrogen atoms and the lattice fluorobenzene molecules have been omitted for clarity.



**Table S1.** Crystallographic data for **1** and **2**.

|                                                                       | <b>1</b>                                                             | <b>2</b>                                                             |
|-----------------------------------------------------------------------|----------------------------------------------------------------------|----------------------------------------------------------------------|
| Formula                                                               | C <sub>46</sub> H <sub>58</sub> AlClDyF <sub>27</sub> O <sub>3</sub> | C <sub>86</sub> H <sub>73</sub> AlClDyF <sub>32</sub> O <sub>2</sub> |
| molecular mass, g mol <sup>-1</sup>                                   | 1396.85                                                              | 1971.37                                                              |
| cryst size, mm                                                        | 0.236 × 0.191 × 0.103                                                | 0.464 × 0.249 × 0.167                                                |
| cryst syst                                                            | orthorhombic                                                         | triclinic                                                            |
| space group                                                           | Pca2 <sub>1</sub>                                                    | P $\bar{1}$                                                          |
| collection temperature, K                                             | 99.97(10)                                                            | 99.97(10)                                                            |
| a, Å                                                                  | 21.2423(2)                                                           | 12.3345(3)                                                           |
| b, Å                                                                  | 14.24450(10)                                                         | 16.0941(5)                                                           |
| c, Å                                                                  | 18.1335(2)                                                           | 21.5697(7)                                                           |
| α, °                                                                  | 90                                                                   | 72.902(3)                                                            |
| β, °                                                                  | 90                                                                   | 78.936(2)                                                            |
| γ, °                                                                  | 90                                                                   | 85.763(2)                                                            |
| V, Å <sup>3</sup>                                                     | 5486.94(9)                                                           | 4015.9(2)                                                            |
| Z                                                                     | 4                                                                    | 2                                                                    |
| ρ <sub>calcd</sub> , g cm <sup>-3</sup>                               | 1.691                                                                | 1.630                                                                |
| μ, mm <sup>-1</sup>                                                   | 9.090                                                                | 1.098                                                                |
| no. of reflections made                                               | 38414                                                                | 36237                                                                |
| no. of unique reflns, R <sub>int</sub>                                | 10820, 0.0303                                                        | 18504, 0.0455                                                        |
| no. of reflns with F <sup>2</sup> > 2σ(F <sup>2</sup> )               | 10124                                                                | 15087                                                                |
| transmn coeff range                                                   | 0.524–1.000                                                          | 0.609–1.000                                                          |
| R, R <sub>w</sub> <sup>a</sup> (F <sup>2</sup> > 2σ(F <sup>2</sup> )) | 0.0451, 0.1287                                                       | 0.0627, 0.1516                                                       |
| R, R <sub>w</sub> <sup>a</sup> (all data)                             | 0.0480, 0.1319                                                       | 0.0807, 0.1623                                                       |
| S <sup>a</sup>                                                        | 1.007                                                                | 1.017                                                                |
| parameters, restraints                                                | 1101, 3151                                                           | 1191, 1674                                                           |
| max., min. diff map, e Å <sup>-3</sup>                                | 0.597, -0.742                                                        | 2.437, -1.094                                                        |

<sup>a</sup> Conventional R =  $\sum||F_o| - |F_c||/\sum|F_o|$ ; R<sub>w</sub> =  $[\sum w(F_o^2 - F_c^2)^2/\sum w(F_o^2)^2]^{1/2}$ ; S =  $[\sum w(F_o^2 - F_c^2)^2/\text{no. data} - \text{no. params}]^{1/2}$  for all data.

#### 4. Magnetic Measurements

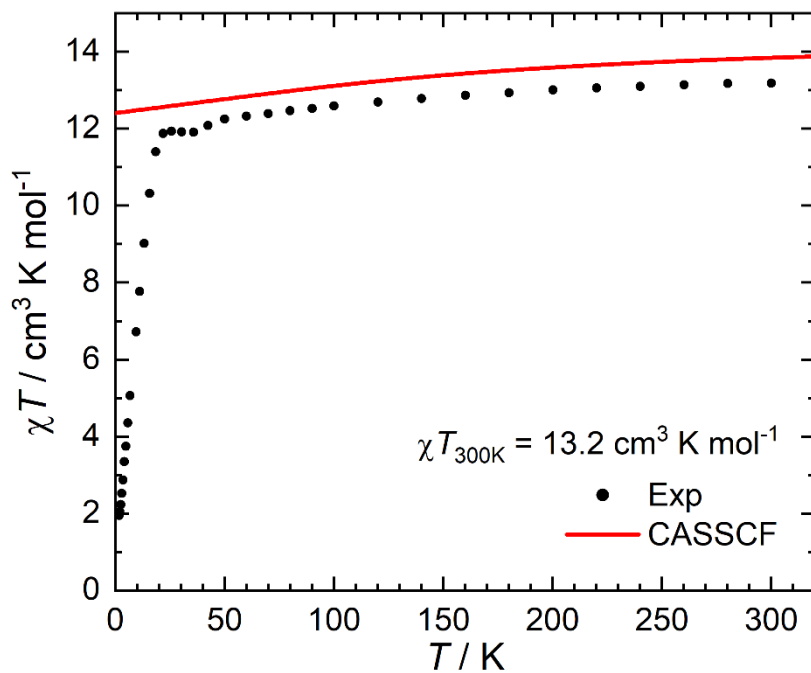

**Figure S12.** Temperature dependence of the molar magnetic susceptibility ( $\chi T$ ) product for powdered **1** measured under a 0.1 T applied magnetic field (black circles) and CASSCF calculated curve (red line).

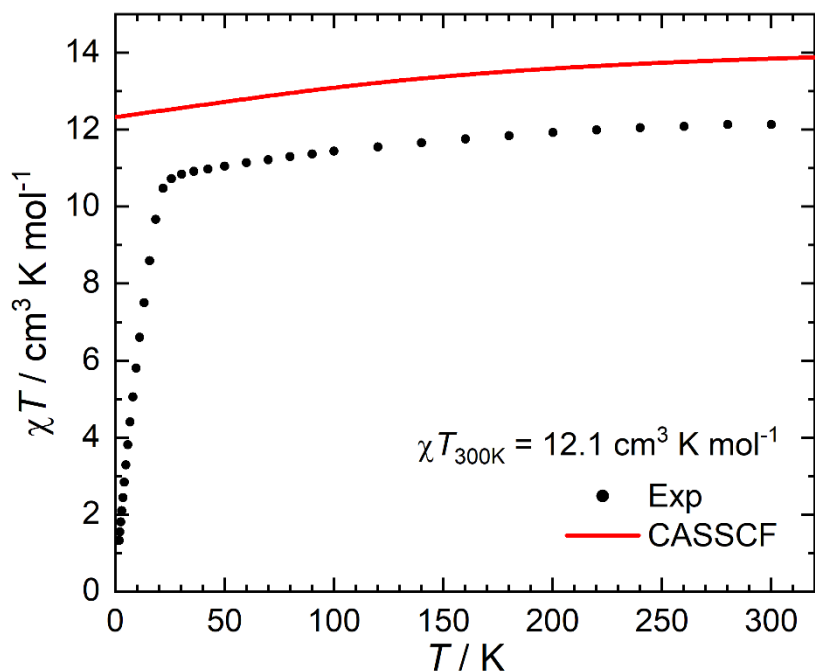

**Figure S13.** Temperature dependence of the molar magnetic susceptibility ( $\chi T$ ) product for powdered **2** measured under a 0.1 T applied magnetic field (black circles) and CASSCF calculated curve (red line).

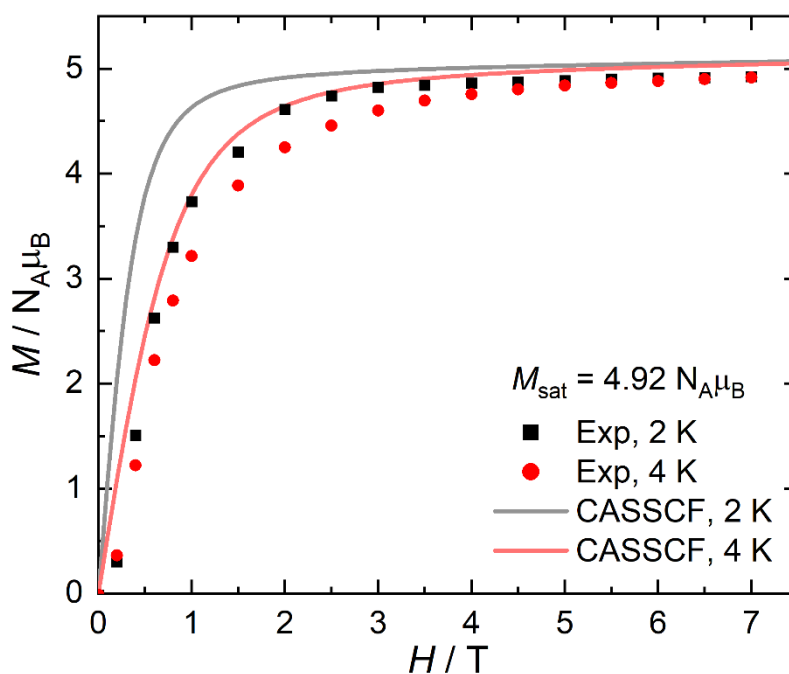

**Figure S14.** Isothermal magnetisation *versus* field for **1** at 2 (black squares) and 4 K (red circles), with CASSCF calculated curves (solid lines).

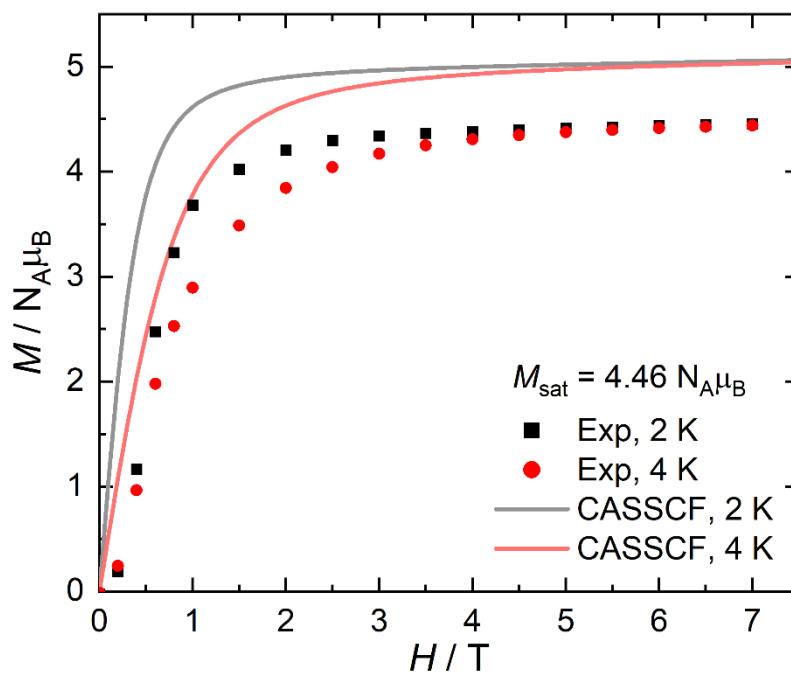

**Figure S15.** Isothermal magnetisation *versus* field for **2** at 2 (black squares) and 4 K (red circles), with CASSCF calculated curves (solid lines).

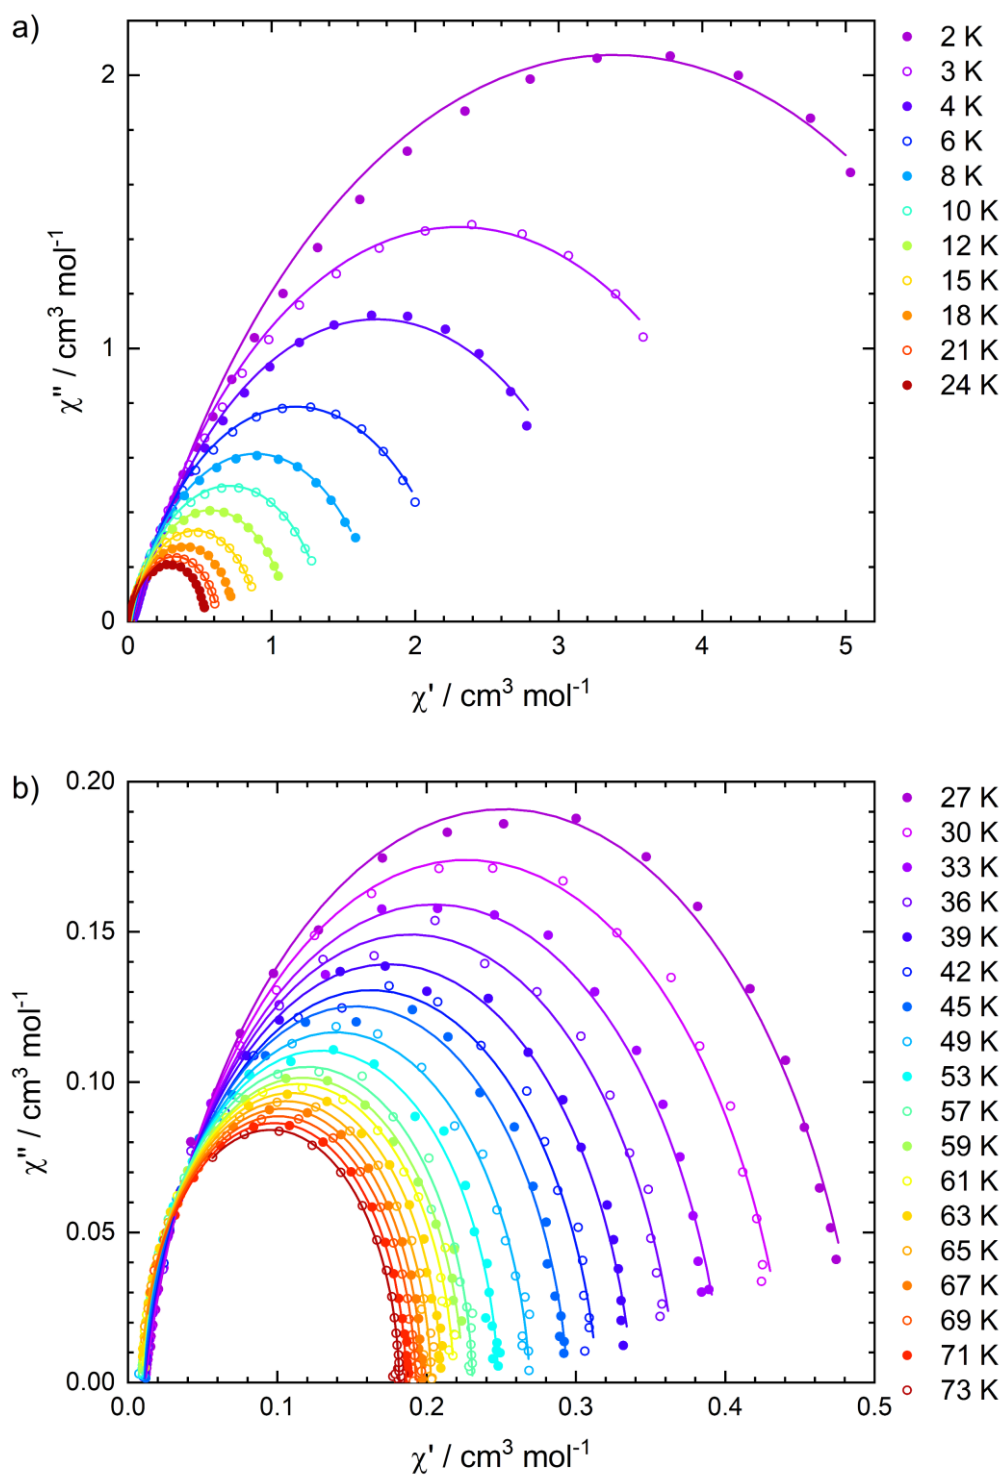

**Figure S16.** Cole-Cole plot for **1** at a) 2–24 K and b) 27–73 K. Solid lines are fits to the generalised Debye model, giving  $0.014 \leq \alpha \leq 0.29$ .

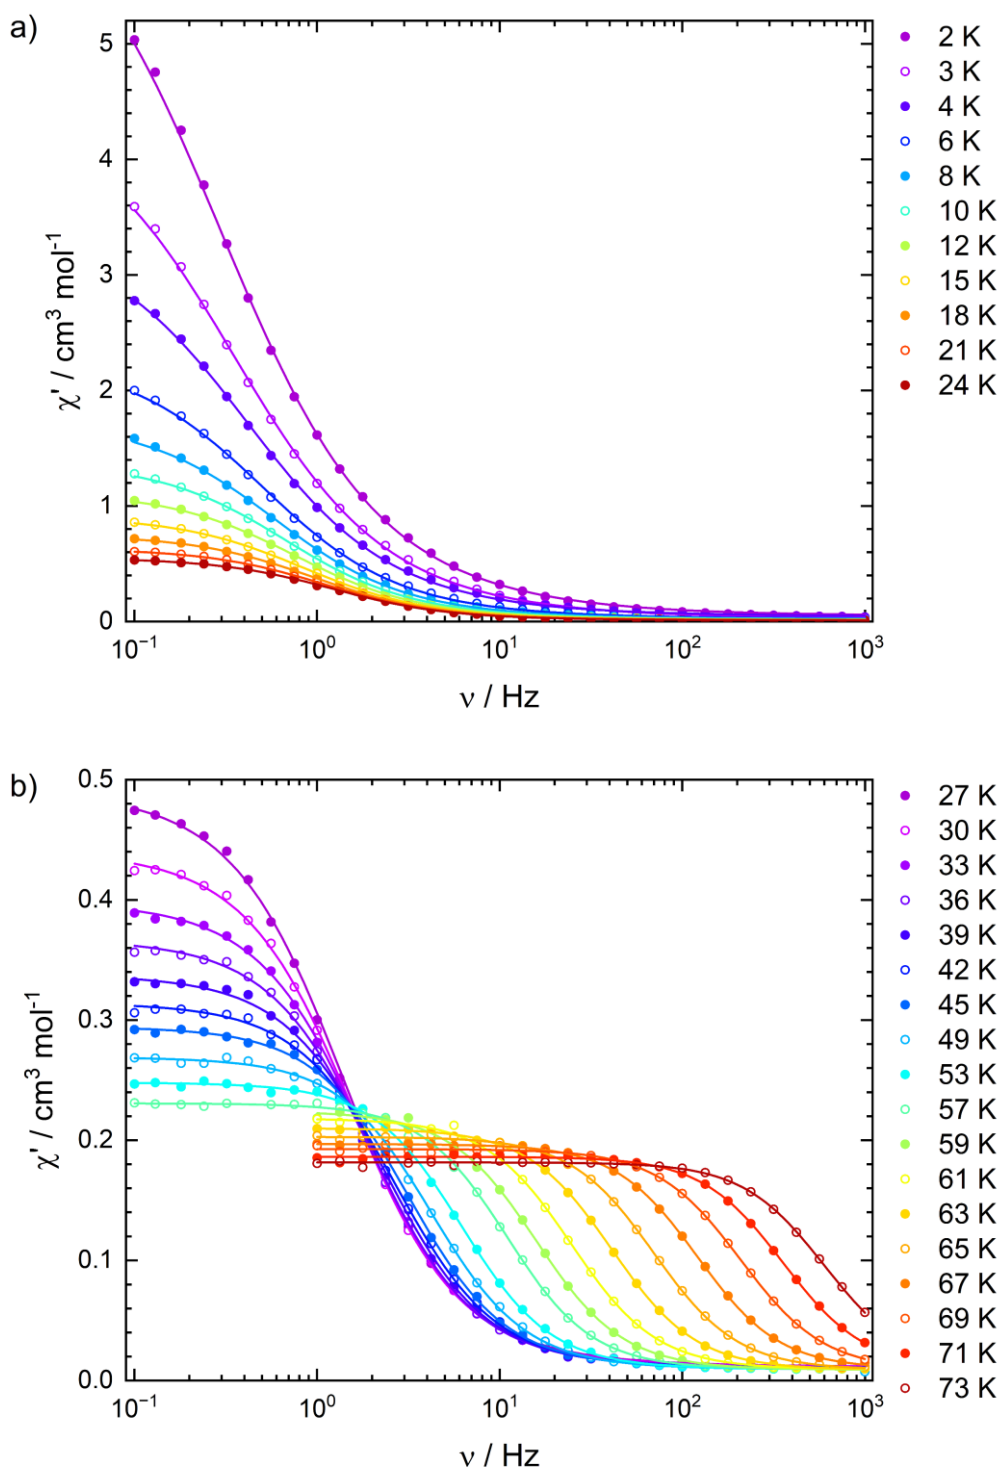

**Figure S17.** In-phase ac susceptibility ( $\chi'$ ) of **1** in a zero field at a) 2–24 K and b) 27–73 K.

Solid lines are fits to the generalised Debye model, giving  $0.014 \leq \alpha \leq 0.29$ .

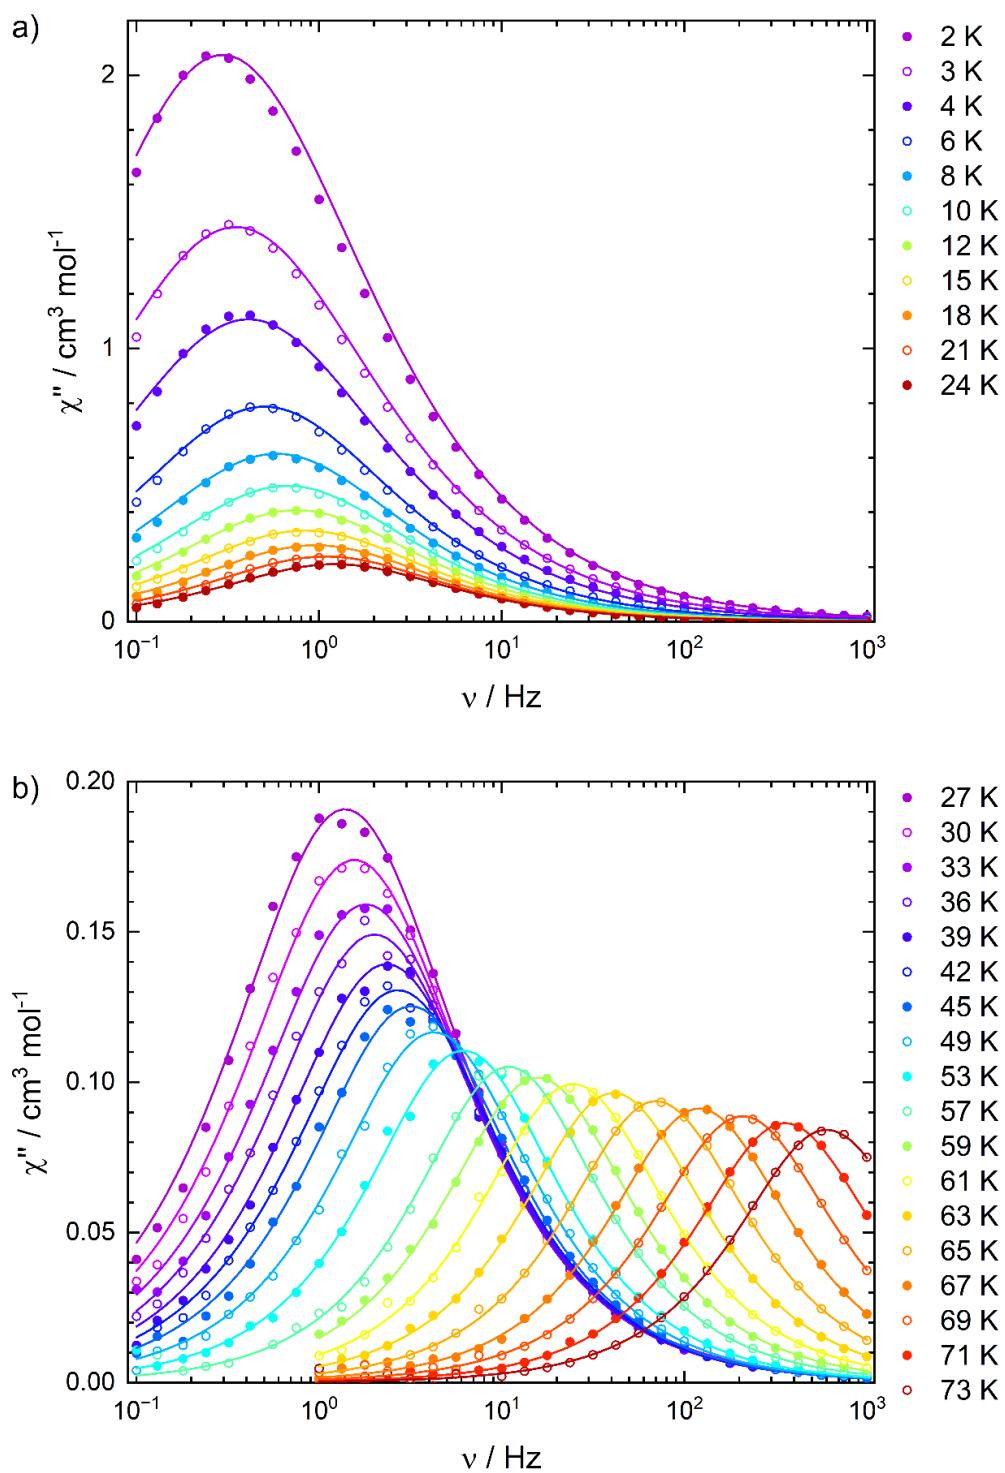

**Figure S18.** Out-of-phase ac susceptibility ( $\chi''$ ) of **1** in a zero field at a) 2–24 K and b) 27–73 K. Solid lines are fits to the generalised Debye model, giving  $0.014 \leq \alpha \leq 0.29$ .

**Table S2.** Best fit parameters to the generalised Debye model for **1**.

| $T$ | $\tau_{\text{debye}}$ | $\tau_{\text{Debye}}^{\text{err}}$ | $\chi_S$               | $\chi_S^{\text{err}}$ | $\chi_T$               | $\chi_T^{\text{err}}$ | $\alpha$ | $\alpha^{\text{err}}$ | $\langle \ln \tau \rangle$ | $\sigma_{(\ln \tau)}$ |
|-----|-----------------------|------------------------------------|------------------------|-----------------------|------------------------|-----------------------|----------|-----------------------|----------------------------|-----------------------|
| (K) | (s)                   |                                    | (cm <sup>3</sup> /mol) |                       | (cm <sup>3</sup> /mol) |                       |          |                       |                            | ln (s)                |
| 2   | 5.38E-1               | 1.02E-2                            | 5.10E-2                | 8.64E-3               | 6.72                   | 5.42E-2               | 2.92E-1  | 4.81E-3               | -0.621                     | 1.807                 |
| 3   | 4.55E-1               | 6.06E-3                            | 2.90E-2                | 4.80E-3               | 4.58                   | 2.63E-2               | 2.79E-1  | 3.72E-3               | -0.788                     | 1.745                 |
| 4   | 3.88E-1               | 4.70E-3                            | 4.77E-2                | 3.78E-3               | 3.42                   | 1.81E-2               | 2.60E-1  | 3.77E-3               | -0.947                     | 1.649                 |
| 6   | 3.16E-1               | 3.66E-3                            | 2.61E-2                | 2.97E-3               | 2.30                   | 1.20E-2               | 2.30E-1  | 4.14E-3               | -1.151                     | 1.504                 |
| 8   | 2.72E-1               | 2.79E-3                            | 2.25E-2                | 2.25E-3               | 1.75                   | 8.11E-3               | 2.14E-1  | 3.96E-3               | -1.302                     | 1.429                 |
| 10  | 2.37E-1               | 1.95E-3                            | 1.95E-2                | 1.57E-3               | 1.39                   | 5.13E-3               | 2.02E-1  | 3.35E-3               | -1.439                     | 1.370                 |
| 12  | 2.12E-1               | 1.36E-3                            | 1.64E-2                | 1.06E-3               | 1.13                   | 3.21E-3               | 1.96E-1  | 2.70E-3               | -1.553                     | 1.343                 |
| 15  | 1.90E-1               | 1.11E-3                            | 1.40E-2                | 8.26E-4               | 9.19E-1                | 2.35E-3               | 1.91E-1  | 2.53E-3               | -1.663                     | 1.319                 |
| 18  | 1.67E-1               | 1.17E-3                            | 1.33E-2                | 8.69E-4               | 7.57E-1                | 2.28E-3               | 1.80E-1  | 3.14E-3               | -1.789                     | 1.264                 |
| 21  | 1.46E-1               | 1.07E-3                            | 1.25E-2                | 8.07E-4               | 6.36E-1                | 1.96E-3               | 1.69E-1  | 3.38E-3               | -1.924                     | 1.216                 |
| 24  | 1.30E-1               | 8.13E-4                            | 1.19E-2                | 6.32E-4               | 5.55E-1                | 1.44E-3               | 1.61E-1  | 2.97E-3               | -2.039                     | 1.176                 |
| 27  | 1.15E-1               | 9.53E-4                            | 1.16E-2                | 7.93E-4               | 4.92E-1                | 1.68E-3               | 1.44E-1  | 4.10E-3               | -2.166                     | 1.097                 |
| 30  | 1.02E-1               | 7.19E-4                            | 1.15E-2                | 6.32E-4               | 4.42E-1                | 1.26E-3               | 1.34E-1  | 3.57E-3               | -2.283                     | 1.047                 |
| 33  | 8.83E-2               | 6.52E-4                            | 1.10E-2                | 6.25E-4               | 3.99E-1                | 1.16E-3               | 1.26E-1  | 3.80E-3               | -2.428                     | 1.007                 |
| 36  | 7.93E-2               | 5.29E-4                            | 1.09E-2                | 5.41E-4               | 3.68E-1                | 9.57E-4               | 1.13E-1  | 3.52E-3               | -2.535                     | 0.947                 |
| 39  | 6.79E-2               | 5.54E-4                            | 1.06E-2                | 6.35E-4               | 3.38E-1                | 1.05E-3               | 1.03E-1  | 4.37E-3               | -2.689                     | 0.893                 |
| 42  | 5.90E-2               | 4.48E-4                            | 1.05E-2                | 5.69E-4               | 3.15E-1                | 8.90E-4               | 9.68E-2  | 4.12E-3               | -2.831                     | 0.862                 |
| 45  | 4.99E-2               | 3.64E-4                            | 1.04E-2                | 5.38E-4               | 2.95E-1                | 7.86E-4               | 8.05E-2  | 4.05E-3               | -2.997                     | 0.775                 |
| 49  | 3.76E-2               | 2.24E-4                            | 9.31E-3                | 4.28E-4               | 2.69E-1                | 5.64E-4               | 6.91E-2  | 3.37E-3               | -3.282                     | 0.712                 |
| 53  | 2.58E-2               | 1.71E-4                            | 9.39E-3                | 4.75E-4               | 2.48E-1                | 5.51E-4               | 4.90E-2  | 3.85E-3               | -3.658                     | 0.590                 |



|    |         |         |         |         |         |         |         |         |        |       |
|----|---------|---------|---------|---------|---------|---------|---------|---------|--------|-------|
| 57 | 1.46E-2 | 1.09E-4 | 9.52E-3 | 5.50E-4 | 2.31E-1 | 5.58E-4 | 3.24E-2 | 4.45E-3 | -4.227 | 0.473 |
| 59 | 1.01E-2 | 6.28E-5 | 8.90E-3 | 4.48E-4 | 2.24E-1 | 6.11E-4 | 3.83E-2 | 3.87E-3 | -4.597 | 0.517 |
| 61 | 6.46E-3 | 5.30E-5 | 9.30E-3 | 6.35E-4 | 2.18E-1 | 7.08E-4 | 3.17E-2 | 5.14E-3 | -5.042 | 0.468 |
| 63 | 3.88E-3 | 1.41E-5 | 8.83E-3 | 3.05E-4 | 2.10E-1 | 2.72E-4 | 2.73E-2 | 2.29E-3 | -5.552 | 0.432 |
| 65 | 2.27E-3 | 1.50E-5 | 9.00E-3 | 6.08E-4 | 2.03E-1 | 4.28E-4 | 2.18E-2 | 4.20E-3 | -6.087 | 0.385 |
| 67 | 1.32E-3 | 6.81E-6 | 9.68E-3 | 5.31E-4 | 1.97E-1 | 2.87E-4 | 1.63E-2 | 3.30E-3 | -6.632 | 0.332 |
| 69 | 7.63E-4 | 6.15E-6 | 8.47E-3 | 9.32E-4 | 1.93E-1 | 3.79E-4 | 2.42E-2 | 4.98E-3 | -7.178 | 0.406 |
| 71 | 4.47E-4 | 4.36E-6 | 9.81E-3 | 1.24E-3 | 1.86E-1 | 3.31E-4 | 1.35E-2 | 5.61E-3 | -7.714 | 0.301 |
| 73 | 2.65E-4 | 4.12E-6 | 9.49E-3 | 2.05E-3 | 1.82E-1 | 3.39E-4 | 1.42E-2 | 7.32E-3 | -8.237 | 0.309 |

---

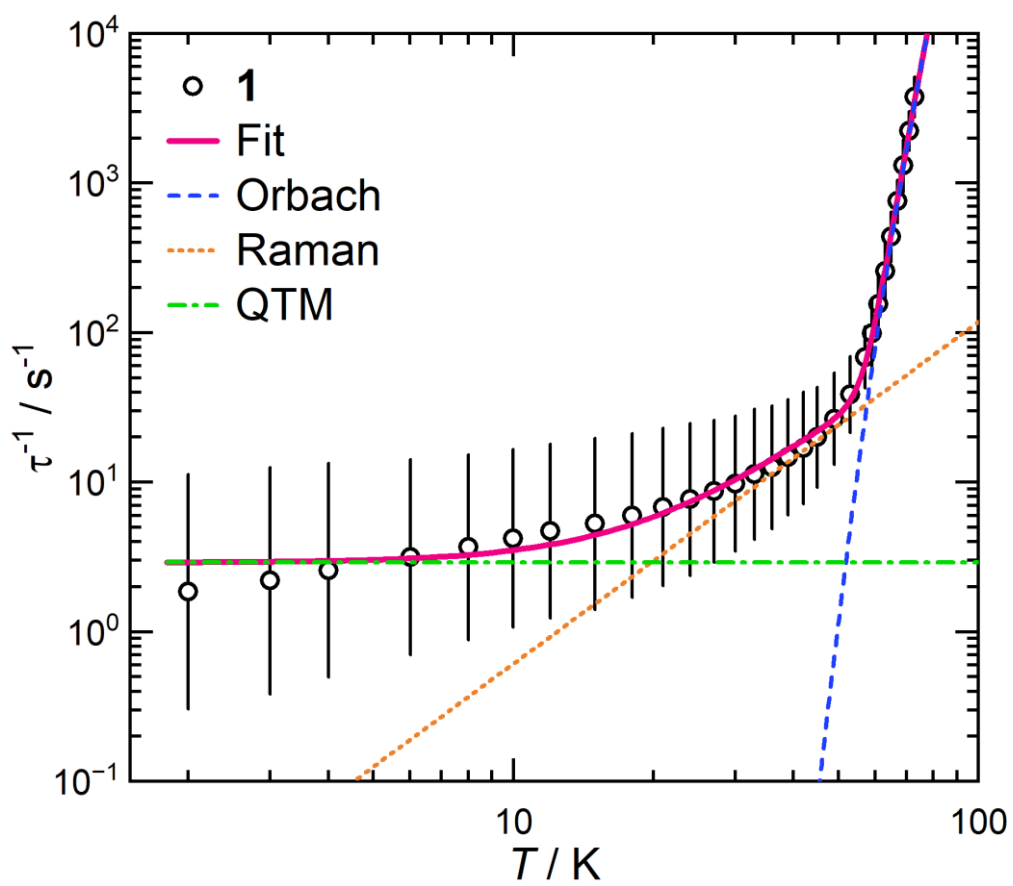

**Figure S19.** Relaxation profile for **1** showing contributions from Orbach, Raman and QTM processes.

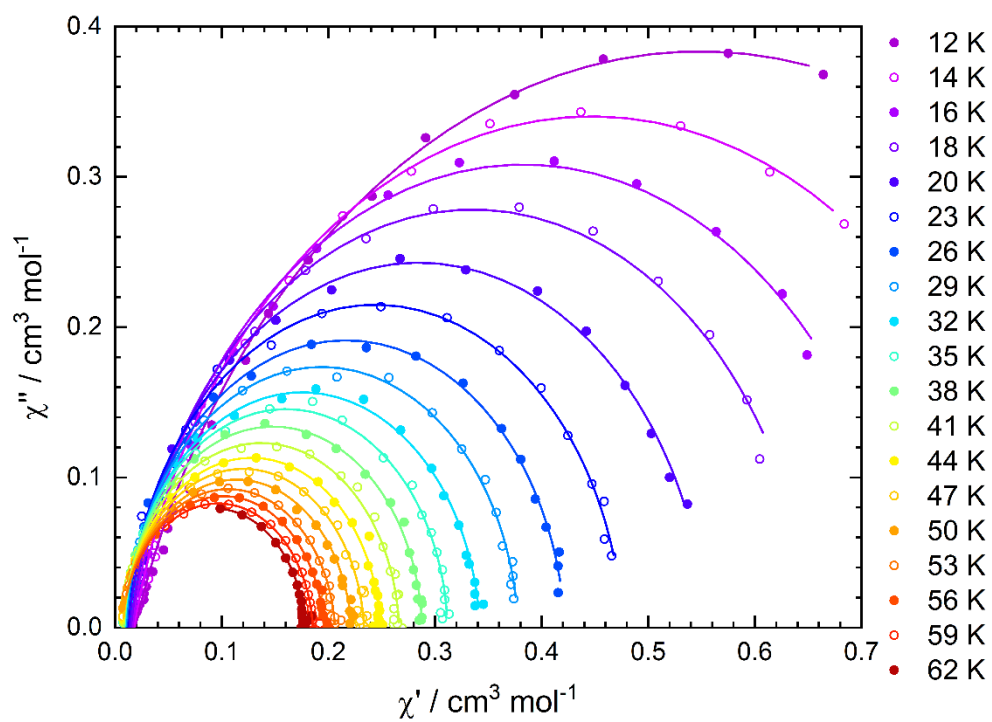

**Figure S20.** Cole-Cole plot for **2** at 12–62 K. Solid lines are fits to the generalised Debye model, giving  $0.025 \leq \alpha \leq 0.20$ .

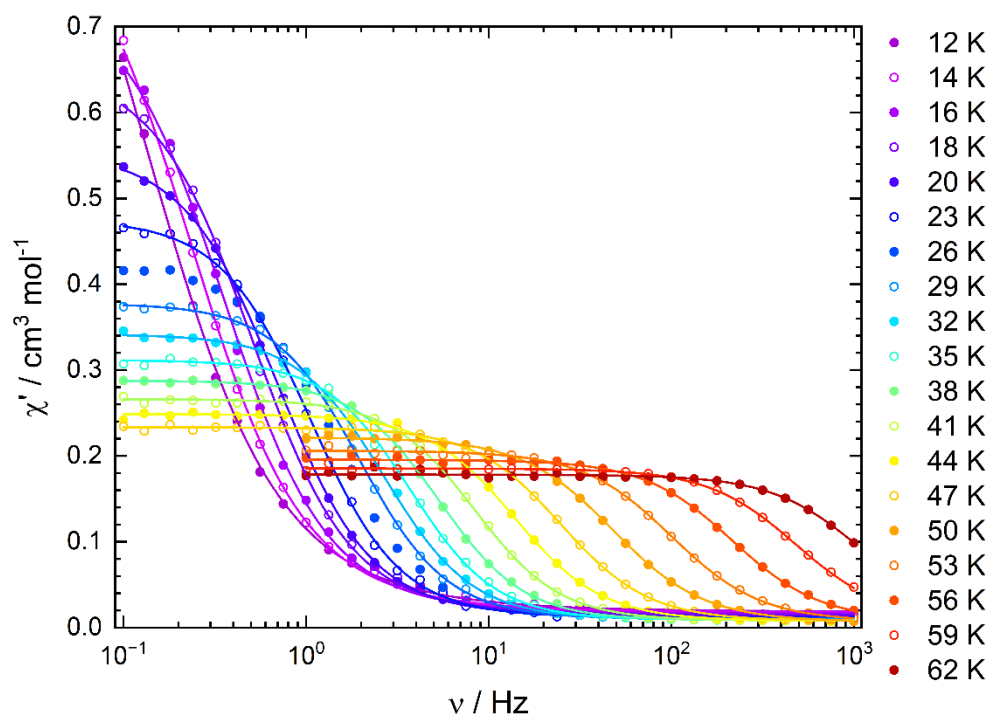

**Figure S21.** In-phase ( $\chi'$ ) ac susceptibility of **2** in a zero field at 12–62 K. Solid lines are fits to the generalised Debye model, giving  $0.025 \leq \alpha \leq 0.20$ .

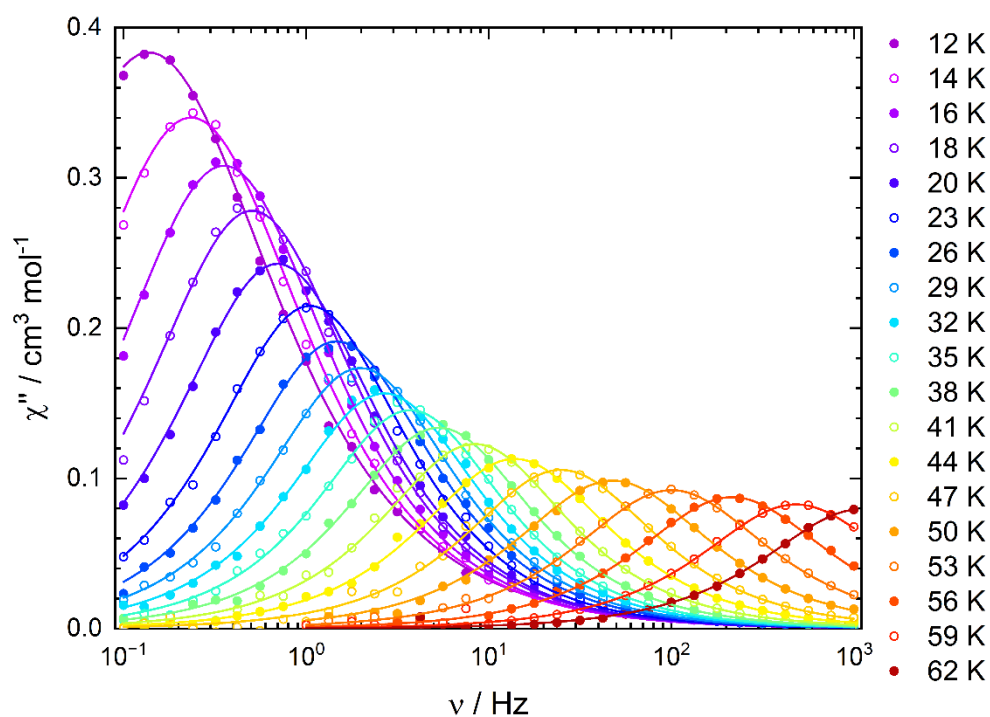

**Figure S22.** Out-of-phase ( $\chi''$ ) ac susceptibilities of **2** in a zero field at 12–62 K. Solid lines are fits to the generalised Debye model, giving  $0.025 \leq \alpha \leq 0.20$ .

**Table S3.** Best fit parameters to the generalised Debye model for **2**.

| $T$ | $\tau_{\text{debye}}$ | $\tau_{\text{Debye}}^{\text{err}}$ | $\chi_S$               | $\chi_S^{\text{err}}$ | $\chi_T$               | $\chi_T^{\text{err}}$ | $\alpha$ | $\alpha^{\text{err}}$ | $\langle \ln \tau \rangle$ | $\sigma_{(\ln \tau)}$ |
|-----|-----------------------|------------------------------------|------------------------|-----------------------|------------------------|-----------------------|----------|-----------------------|----------------------------|-----------------------|
| (K) | (s)                   |                                    | (cm <sup>3</sup> /mol) |                       | (cm <sup>3</sup> /mol) |                       |          |                       |                            | ln (s)                |
| 12  | 1.15                  | 2.32E-2                            | 1.86E-2                | 1.01E-3               | 1.08                   | 1.14E-2               | 2.02E-1  | 4.97E-3               | 0.142                      | 1.370                 |
| 14  | 6.78E-1               | 8.18E-3                            | 1.78E-2                | 9.27E-4               | 8.76E-1                | 5.93E-3               | 1.46E-1  | 4.42E-3               | -0.389                     | 1.106                 |
| 16  | 4.49E-1               | 4.39E-3                            | 1.63E-2                | 9.49E-4               | 7.50E-1                | 4.17E-3               | 1.10E-1  | 4.50E-3               | -0.801                     | 0.929                 |
| 18  | 3.14E-1               | 2.82E-3                            | 1.48E-2                | 9.59E-4               | 6.56E-1                | 3.24E-3               | 8.96E-2  | 4.64E-3               | -1.159                     | 0.824                 |
| 20  | 2.29E-1               | 1.31E-3                            | 1.28E-2                | 6.06E-4               | 5.56E-1                | 1.67E-3               | 7.14E-2  | 3.17E-3               | -1.476                     | 0.725                 |
| 23  | 1.52E-1               | 1.00E-3                            | 1.14E-2                | 6.95E-4               | 4.76E-1                | 1.54E-3               | 5.03E-2  | 3.86E-3               | -1.885                     | 0.598                 |
| 26  | 1.08E-1               | 6.55E-4                            | 1.09E-2                | 6.02E-4               | 4.22E-1                | 1.15E-3               | 4.61E-2  | 3.55E-3               | -2.222                     | 0.571                 |
| 29  | 8.05E-2               | 4.49E-4                            | 1.02E-2                | 5.31E-4               | 3.78E-1                | 9.00E-4               | 3.70E-2  | 3.32E-3               | -2.520                     | 0.508                 |
| 32  | 5.94E-2               | 3.71E-4                            | 9.21E-3                | 5.62E-4               | 3.42E-1                | 8.55E-4               | 3.85E-2  | 3.71E-3               | -2.824                     | 0.518                 |
| 35  | 4.28E-2               | 3.30E-4                            | 9.05E-3                | 6.76E-4               | 3.12E-1                | 9.17E-4               | 2.52E-2  | 4.66E-3               | -3.152                     | 0.415                 |
| 38  | 2.98E-2               | 1.72E-4                            | 8.42E-3                | 4.88E-4               | 2.88E-1                | 5.91E-4               | 2.76E-2  | 3.45E-3               | -3.512                     | 0.435                 |
| 41  | 1.90E-2               | 1.63E-4                            | 8.01E-3                | 7.16E-4               | 2.66E-1                | 7.56E-4               | 3.14E-2  | 5.13E-3               | -3.963                     | 0.465                 |
| 44  | 1.15E-2               | 8.31E-5                            | 7.47E-3                | 6.00E-4               | 2.49E-1                | 5.42E-4               | 4.19E-2  | 4.25E-3               | -4.466                     | 0.542                 |
| 47  | 6.41E-3               | 7.13E-5                            | 7.40E-3                | 9.55E-4               | 2.33E-1                | 7.18E-4               | 4.25E-2  | 6.55E-3               | -5.051                     | 0.546                 |
| 50  | 3.33E-3               | 2.72E-5                            | 6.36E-3                | 7.32E-4               | 2.22E-1                | 6.08E-4               | 5.66E-2  | 4.94E-3               | -5.704                     | 0.638                 |
| 53  | 1.59E-3               | 1.55E-5                            | 6.77E-3                | 9.76E-4               | 2.06E-1                | 5.69E-4               | 5.02E-2  | 5.92E-3               | -6.444                     | 0.597                 |
| 56  | 7.39E-4               | 9.98E-6                            | 7.39E-3                | 1.56E-3               | 1.96E-1                | 5.85E-4               | 4.64E-2  | 7.91E-3               | -7.210                     | 0.573                 |
| 59  | 3.31E-4               | 8.92E-6                            | 8.23E-3                | 3.39E-3               | 1.85E-1                | 6.87E-4               | 4.43E-2  | 1.31E-2               | -8.014                     | 0.559                 |
| 62  | 1.46E-4               | 1.02E-5                            | 6.58E-3                | 8.59E-3               | 1.78E-1                | 6.92E-4               | 4.98E-2  | 2.07E-2               | -8.829                     | 0.595                 |

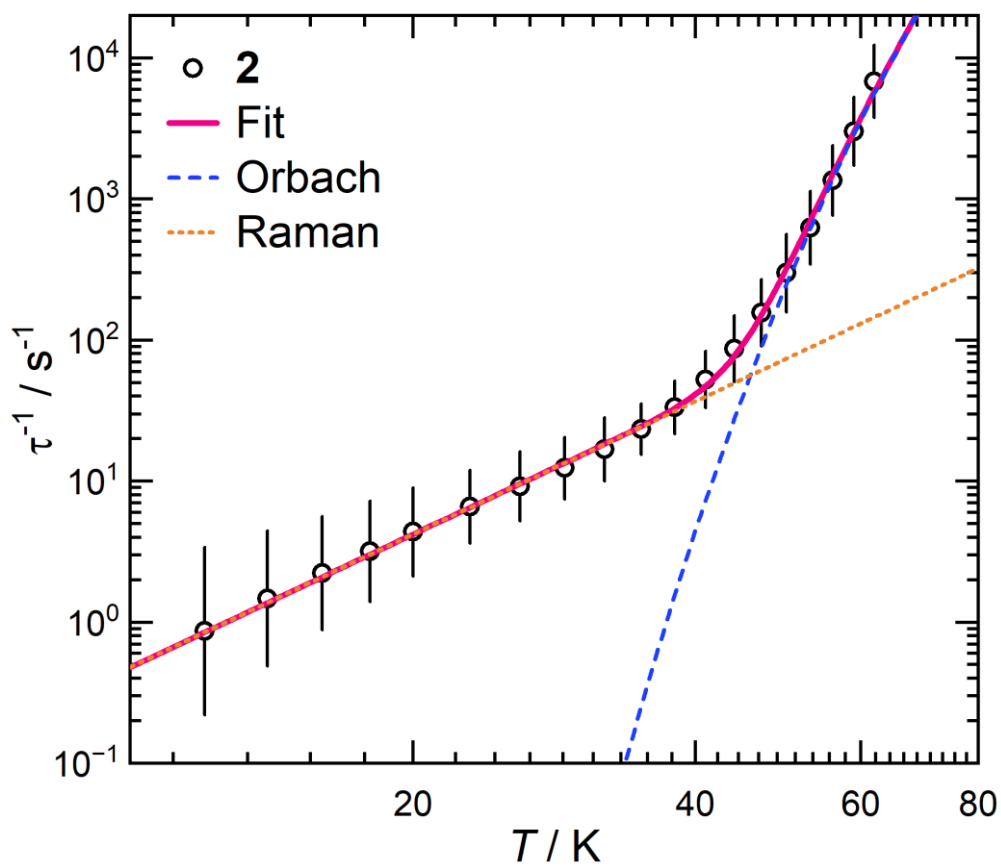

**Figure S23.** Relaxation profile for **2** showing contributions from Orbach and Raman processes.

## 5. CASSCF-SO Calculations

**Table S4.** Electronic structure of **1** calculated with the crystal field parameters obtained from CASSCF-SO using the solid-state geometry of **1** in zero-field. Each row corresponds to a Kramers doublet.

| Energy<br>(cm <sup>-1</sup> ) | Energy<br>(K) | g <sub>x</sub> | g <sub>y</sub> | g <sub>z</sub> | Angle <sup>a</sup><br>(deg) | Wavefunction                                                                                                                                                                                          | $\langle J_z \rangle$ |
|-------------------------------|---------------|----------------|----------------|----------------|-----------------------------|-------------------------------------------------------------------------------------------------------------------------------------------------------------------------------------------------------|-----------------------|
| 0.00                          | 0.00          | 0.0002         | 0.0002         | 19.92          | --                          | 98% $ \pm 15/2\rangle$                                                                                                                                                                                | $\pm 7.469$           |
| 357.76                        | 514.81        | 0.005          | 0.005          | 17.0           | 2.2                         | 98% $ \pm 13/2\rangle$                                                                                                                                                                                | $\pm 6.452$           |
| 608.55                        | 875.69        | 0.04           | 0.04           | 14.3           | 4.4                         | 94% $ \pm 11/2\rangle$ + 2% $ \pm 7/2\rangle$                                                                                                                                                         | $\pm 5.454$           |
| 778.57                        | 1120.34       | 0.2            | 0.3            | 11.5           | 3.3                         | 88% $ \pm 9/2\rangle$ + 6% $ \pm 5/2\rangle$ +<br>2% $ \pm 13/2\rangle$ + 2% $ \pm 7/2\rangle$                                                                                                        | $\pm 4.375$           |
| 892.47                        | 1284.25       | 3.8            | 5.3            | 7.4            | 14.1                        | 68% $ \pm 7/2\rangle$ + 18% $ \pm 3/2\rangle$<br>+ 6% $ \mp 1/2\rangle$ + 3% $ \pm 11/2\rangle$                                                                                                       | $\pm 2.800$           |
| 970.47                        | 1396.49       | 2.4            | 5.0            | 10.9           | 84.0                        | 45% $ \pm 5/2\rangle$ + 26% $ \pm 1/2\rangle$<br>+ 13% $ \mp 7/2\rangle$ + 6% $ \mp 3/2\rangle$ + 5% $ \pm 9/2\rangle$ + 3% $ \pm 7/2\rangle$                                                         | $\pm 1.007$           |
| 1105.25                       | 1590.43       | 0.09           | 0.2            | 16.0           | 88.3                        | 28% $ \pm 3/2\rangle$ + 20% $ \mp 5/2\rangle$<br>+ 16% $ \pm 5/2\rangle$ + 15%<br>$ \mp 3/2\rangle$ + 6% $ \pm 7/2\rangle$ + 5%<br>$ \pm 1/2\rangle$ + 4% $ \mp 1/2\rangle$ + 4%<br>$ \mp 7/2\rangle$ | $\pm 0.157$           |
| 1321.33                       | 1901.36       | 0.008          | 0.02           | 19.4           | 88.8                        | 29% $ \pm 1/2\rangle$ + 28% $ \mp 1/2\rangle$<br>+ 18% $ \pm 3/2\rangle$ + 14%<br>$ \mp 3/2\rangle$ + 6% $ \pm 5/2\rangle$ + 4%<br>$ \mp 5/2\rangle$                                                  | $\pm 0.143$           |

<sup>a</sup> The angle between the g<sub>z</sub> value of the excited Kramers doublet and the ground Kramers doublet.

**Table S5.** Electronic structure of **2** calculated with the crystal field parameters obtained from CASSCF-SO using the solid-state geometry of **2** in zero-field. Each row corresponds to a Kramers doublet.

| Energy<br>(cm <sup>-1</sup> ) | Energy<br>(K) | g <sub>x</sub> | g <sub>y</sub> | g <sub>z</sub> | Angle <sup>a</sup><br>(deg) | Wavefunction                                                                                                        | <J <sub>z</sub> > |
|-------------------------------|---------------|----------------|----------------|----------------|-----------------------------|---------------------------------------------------------------------------------------------------------------------|-------------------|
| 0.00                          | 0.00          | 0.0001         | 0.0002         | 19.86          | --                          | 97%  ± 15/2> + 3%  ± 11/2>                                                                                          | ±7.446            |
| 340.89                        | 490.53        | 0.004          | 0.005          | 16.9           | 2.8                         | 95%  ± 13/2> + 4%  ± 9/2>                                                                                           | ±6.404            |
| 584.20                        | 840.65        | 0.2            | 0.2            | 14.2           | 5.9                         | 90%  ± 11/2> + 5%  ± 7/2> +<br>3%  ± 9/2> + 2%  ± 15/2>                                                             | ±5.365            |
| 736.51                        | 1059.82       | 2.4            | 3.4            | 10.2           | 4.4                         | 70%  ± 9/2> + 13%  ± 5/2> +<br>4%  ± 1/2> + 4%  ± 13/2> +<br>4%  ± 7/2> + 2%  ± 3/2>                                | ±3.916            |
| 820.75                        | 1181.04       | 3.9            | 7.0            | 8.1            | 80.2                        | 39%  ± 7/2> + 25%  ± 3/2> +<br>14%  ∓ 1/2> + 8%  ∓ 9/2> +<br>6%  ± 11/2> + 3%  ∓ 5/2> +<br>2%  ± 5/2> + 2%  ± 9/2>  | ±1.664            |
| 917.08                        | 1319.65       | 0.03           | 0.3            | 13.5           | 82.8                        | 19%  ± 7/2> + 18%  ± 5/2> +<br>15%  ∓ 7/2> + 13%  ± 1/2> +<br>13%  ∓ 5/2> + 8%  ± 9/2> +<br>7%  ∓ 1/2> + 3%  ∓ 9/2> | ±0.584            |
| 1073.12                       | 1544.19       | 0.1            | 0.2            | 16.5           | 88.0                        | 24%  ± 5/2> + 19%  ∓ 3/2> +<br>18%  ± 3/2> + 15%  ∓ 5/2> +<br>8 ∓ 7/2> + 6%  ± 7/2> + 5%<br> ± 1/2> + 2  ∓ 1/2>     | ±0.189            |
| 1317.98                       | 1896.55       | 0.005          | 0.006          | 19.5           | 88.5                        | 28%  ± 1/2> + 26%  ∓ 1/2> +<br>19%  ± 3/2> + 14%  ∓ 3/2> +<br>7%  ± 5/2> + 4%  ∓ 5/2>                               | ±0.178            |

<sup>a</sup> The angle between the g<sub>z</sub> value of the excited Kramers doublet and the ground Kramers doublet.
